# Supplementary material for: Luminescence enhancement and energy transfers of Ce3+ and Sm3+ in CaSrSiO4 phosphor
Source: Royal Society of Chemistry journal article supplement (doi:10.1039/c8tc02143k), 2018-01-01
Supplement: c8tc02143k1.pdf [file c8tc02143k1.pdf]

## Electronic Supporting Information

### The Luminescence Enhancement and Energy Transfer of $\text{Ce}^{3+}$ and $\text{Sm}^{3+}$ in $\text{CaSrSiO}_4$ Phosphor

Wasim ullah khan<sup>a</sup>, Lei Zhou<sup>\*a</sup>, Qiongyun Liang<sup>a</sup>, Xiaohui Li<sup>a</sup>, Jing Yan<sup>a</sup>, Naveed ur Rahman<sup>a</sup> Leonid Dolgov<sup>a</sup>,  
Shahid ullah khan<sup>b</sup>, Jianxin Shi<sup>\*a</sup> and Mingmei Wu<sup>a</sup>

*a. MOE Key Laboratory of Bioinorganic and Synthetic Chemistry, Key Laboratory of Environment and Energy Chemistry of Guangdong Higher Education Institutes, School of Chemistry, Sun Yat-Sen (Zhongshan) University, Guangzhou 510275, P. R. China.*

*b. College of Plant Sciences and Technology and National Key Laboratory of Crop Genetics Improvement, Huazhong Agricultural University, Wuhan 430070, P. R. China.*

*\* Corresponding authors. Tel: +86 20 8411 2830; fax: +86 20 8411 2245.*

*E-mail address: nx-zhoulei@foxmail.com; cessjx@mail.sysu.edu.cn*

**Table S1.** Refined unit cell parameters and atomic coordinates of  $\text{Ca}_{0.97}\text{Sr}_{0.97}\text{Ce}_{0.01}\text{Sm}_{0.02}\text{Na}_{0.03}\text{SiO}_4$ .

| Atom                                                                                                                                                                                                                                           | site | X          | Y          | Z          |
|------------------------------------------------------------------------------------------------------------------------------------------------------------------------------------------------------------------------------------------------|------|------------|------------|------------|
| Sr1                                                                                                                                                                                                                                            | 4a   | 0.2812(43) | 0.4260(92) | 0.7506(26) |
| Sr2                                                                                                                                                                                                                                            | 4a   | 0.4502(44) | 0.0919(63) | 0.7881(26) |
| Sr3                                                                                                                                                                                                                                            | 4a   | 0.1122(48) | 0.0606(71) | 0.7844(25) |
| Ca1                                                                                                                                                                                                                                            | 4a   | 0.0024(99) | 0.1996(12) | 0.2811(59) |
| Ca2                                                                                                                                                                                                                                            | 4a   | 0.3343(10) | 0.1922(14) | 0.2707(59) |
| Ca3                                                                                                                                                                                                                                            | 4a   | 0.1677(93) | 0.3125(16) | 0.2446(54) |
| Si1                                                                                                                                                                                                                                            | 4a   | 0.2642(15) | 0.0805(25) | 0.7712(61) |
| Si2                                                                                                                                                                                                                                            | 4a   | 0.4169(92) | 0.4497(20) | 0.7716(57) |
| Si3                                                                                                                                                                                                                                            | 4a   | 0.0974(18) | 0.4360(24) | 0.8184(49) |
| O1                                                                                                                                                                                                                                             | 4a   | 0.111      | 0.065      | 0.318      |
| O2                                                                                                                                                                                                                                             | 4a   | 0.445      | 0.067      | 0.322      |
| O3                                                                                                                                                                                                                                             | 4a   | 0.249      | 0.194      | 0.531      |
| O4                                                                                                                                                                                                                                             | 4a   | 0.065      | 0.328      | 0.987      |
| O5                                                                                                                                                                                                                                             | 4a   | 0.227      | 0.156      | 0.981      |
| O6                                                                                                                                                                                                                                             | 4a   | 0.083      | 0.309      | 0.542      |
| O7                                                                                                                                                                                                                                             | 4a   | 0.281      | 0.436      | 0.3        |
| O8                                                                                                                                                                                                                                             | 4a   | 0.333      | 0.061      | 0.82       |
| O9                                                                                                                                                                                                                                             | 4a   | 0.166      | 0.431      | 0.813      |
| O10                                                                                                                                                                                                                                            | 4a   | 0.403      | 0.328      | 0.978      |
| O11                                                                                                                                                                                                                                            | 4a   | 0.002      | 0.056      | 0.753      |
| O12                                                                                                                                                                                                                                            | 4a   | 0.403      | 0.341      | 0.5        |
| Formula: $\text{CaSrSiO}_4$ ;<br>Symmetry: Orthorhombic;<br>Space Group: $Pna2_1(33)$ ;<br>Cell parameters: $a = 20.8653 (14) \text{ \AA}$ ; $b = 9.47962 (62) \text{ \AA}$ ; $c = 5.59615(37) \text{ \AA}$ ; $V = 1106.89 (13) \text{ \AA}^3$ |      |            |            |            |

**Table S2.** Comparison of the CIE Chromaticity Coordinates ( $x$ ,  $y$ ) for  $\text{Ca}_{0.99-y}\text{Sr}_{0.99-y}\text{Ce}_{0.01}\text{Sm}_y\text{Na}_{0.01+y}\text{SiO}_4$  ( $y = 0$  to  $0.025$ ) and  $\text{Ca}_{0.99}\text{Sr}_{0.99}\text{Sm}_{0.01}\text{Na}_{0.01}\text{SiO}_4$  phosphors.

| Sample | Sample Composition ( $y$ )                                                     | CIE coordinates ( $x$ , $y$ ) |
|--------|--------------------------------------------------------------------------------|-------------------------------|
| 1      | 0                                                                              | (0.155, 0.066)                |
| 2      | 0.005                                                                          | (0.200, 0.092)                |
| 3      | 0.01                                                                           | (0.238, 0.132)                |
| 4      | 0.015                                                                          | (0.281, 0.163)                |
| 5      | 0.02                                                                           | (0.302, 0.183)                |
| 6      | 0.025                                                                          | (0.390, 0.245)                |
| 7      | $\text{Ca}_{0.99}\text{Sr}_{0.99}\text{Sm}_{0.01}\text{Na}_{0.01}\text{SiO}_4$ | (0.599, 0.389)                |

**Table S3.** Lifetimes, fitting parameters, ET rates, and ET efficiencies for  $\text{Ca}_{0.99-y}\text{Sr}_{0.99-y}\text{Ce}_{0.01}\text{Sm}_y\text{Na}_{0.01+y}\text{SiO}_4$ .

| $\text{Sm}^{3+}$ | $\tau_1$ (ns)  | $\tau_2$ (ns)  | $A_1$  | $A_2$  | $R^2_{\text{adj}}$ | $\tau^*$ (ns) | $^{\text{a}}k_{\text{ET}}$ ( $\mu\text{s})^{-1}$ | $\eta$ (%) |
|------------------|----------------|----------------|--------|--------|--------------------|---------------|--------------------------------------------------|------------|
| 0                | $38.9 \pm 0$   | $38.9 \pm 0$   | 0.1185 | 0.1185 | 0.9994             | 38.9          | 0.0                                              | 0.0        |
| 0.005            | $3 \pm 0.6$    | $40.4 \pm 0.5$ | 0.2965 | 0.6886 | 0.9959             | 37.8          | 0.75                                             | 2.83       |
| 0.01             | $50.9 \pm 0.3$ | $26.3 \pm 0.5$ | 0.6657 | 0.2080 | 0.9970             | 36.14         | 1.96                                             | 7.10       |
| 0.015            | $22 \pm 0.08$  | $44.8 \pm 0.2$ | 0.9776 | 0.5912 | 0.9958             | 34.04         | 3.67                                             | 12.49      |
| 0.02             | $17 \pm 0.04$  | $38.7 \pm 0.2$ | 0.1416 | 0.1685 | 0.9957             | 29.44         | 8.26                                             | 24.32      |
| 0.025            | $13 \pm 0.02$  | $37.2 \pm 0.1$ | 0.9863 | 0.5632 | 0.9918             | 23.08         | 17.62                                            | 40.67      |

**Table S4.** The fitting parameters and the  $c_A/c_0$  ratios obtained from the Inokuti-Hirayama model.

| $c_A(\text{Sm}^{3+})$ | $R^2_{\text{adj}}$ | $c_A/c_0$ |
|-----------------------|--------------------|-----------|
| 0                     | 0.9994             | -         |
| 0.005                 | 0.9959             | 0.28      |
| 0.01                  | 0.9970             | 0.22      |
| 0.015                 | 0.9958             | 0.45      |
| 0.02                  | 0.9957             | 0.53      |
| 0.025                 | 0.9918             | 1.14      |

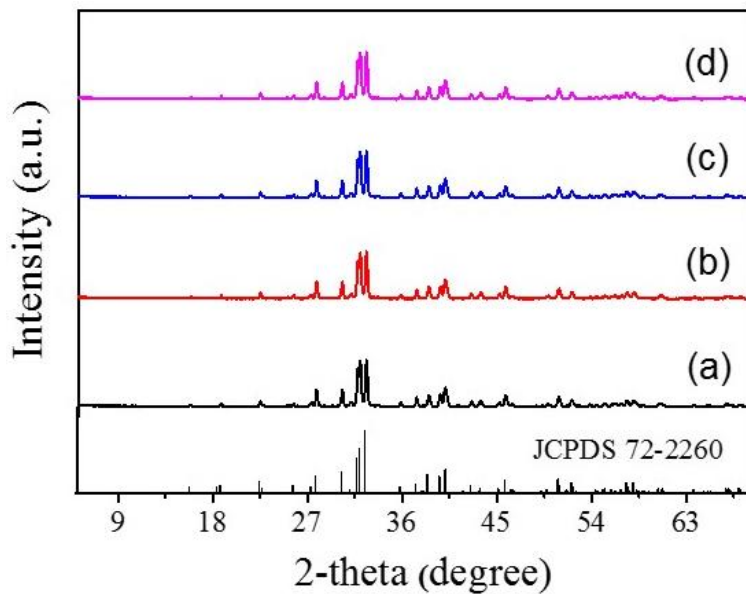

**Fig. S1** XRD profiles of as-synthesized phosphors of  $\text{Ca}_{0.99}\text{Sr}_{0.99}\text{Ce}_{0.01}\text{Na}_{0.01}\text{SiO}_4$  (a),  $\text{Ca}_{0.99}\text{Sr}_{0.99}\text{Sm}_{0.01}\text{Na}_{0.01}\text{SiO}_4$  (b),  $\text{Ca}_{0.98}\text{Sr}_{0.98}\text{Ce}_{0.01}\text{Sm}_{0.01}\text{Na}_{0.02}\text{SiO}_4$  (c) and  $\text{Ca}_{0.97}\text{Sr}_{0.97}\text{Ce}_{0.01}\text{Sm}_{0.02}\text{Na}_{0.03}\text{SiO}_4$  (d).

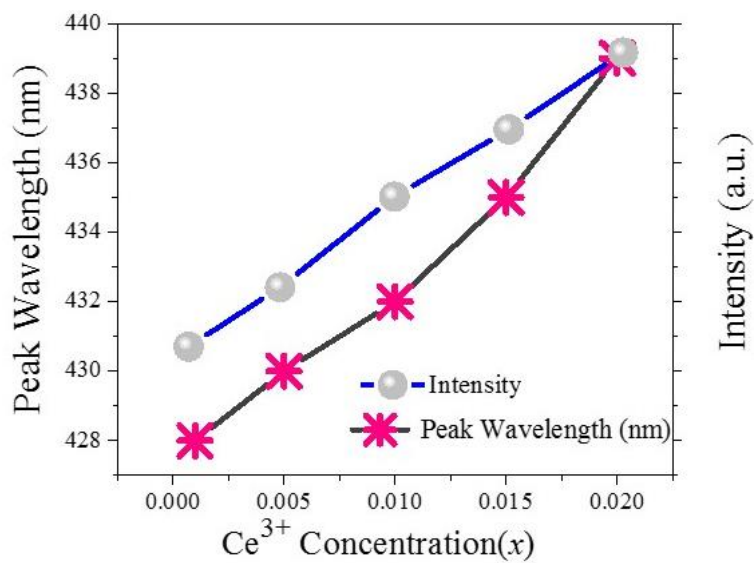

**Fig. S2** Variation of emission intensity and peak wavelength as a function of  $\text{Ce}^{3+}$  concentration in  $\text{Ca}_{1-x}\text{Sr}_{1-x}\text{Ce}_x\text{Na}_y\text{SiO}_4$ .

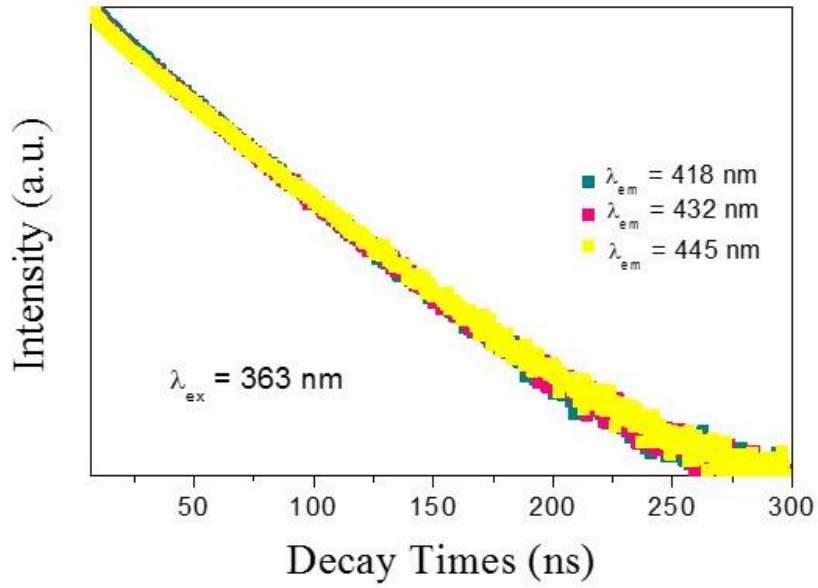

**Fig. S3** Decay curves of  $\text{Ca}_{0.99}\text{Sr}_{0.99}\text{Ce}_{0.01}\text{Na}_{0.01}\text{SiO}_4$  phosphor monitored at some selected wavelengths in the corresponding emission spectrum.

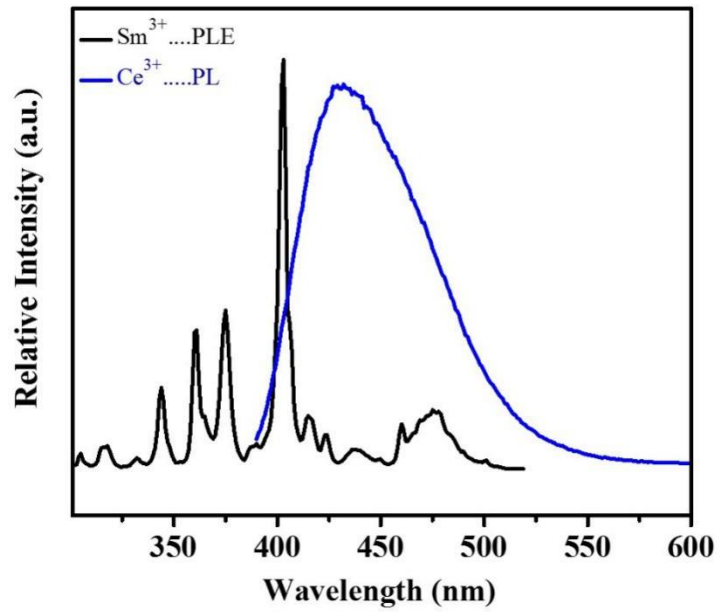

**Fig. S4** Spectral overlapping between the  $\text{Ce}^{3+}$  emission band of  $\text{Ca}_{0.99}\text{Sr}_{0.99}\text{Ce}_{0.01}\text{Na}_{0.01}\text{SiO}_4$  and the excitation spectrum of  $\text{Ca}_{0.99}\text{Sr}_{0.99}\text{Sm}_{0.01}\text{Na}_{0.01}\text{SiO}_4$ .

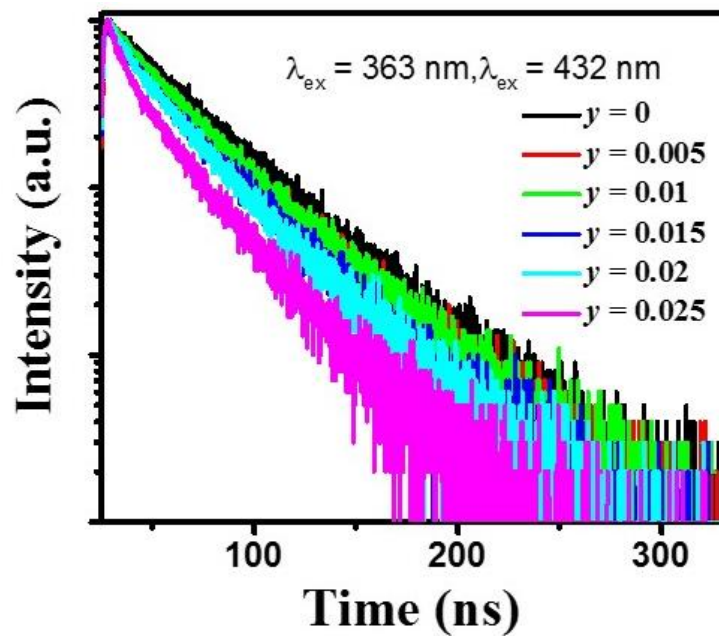

Fig. S5 Decay curves of  $\text{Ca}_{0.99-y}\text{Sr}_{0.99-y}\text{Ce}_{0.01}\text{Sm}_y\text{Na}_{0.01+y}\text{SiO}_4$  ( $y = 0$  to  $0.025$ ) phosphors.

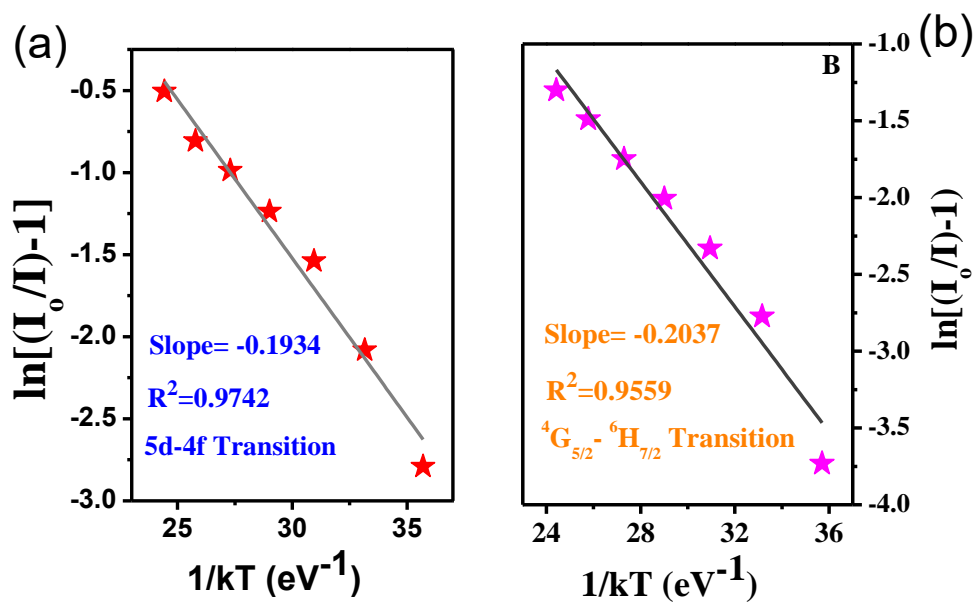

Fig. S6 The fitting lines of  $\ln[(I_0/I)-1]$  versus  $1/kT$  for the blue (a) and yellow-orange (b) emissions of  $\text{Ca}_{0.97}\text{Sr}_{0.97}\text{Ce}_{0.01}\text{Sm}_{0.02}\text{Na}_{0.03}\text{SiO}_4$  phosphor.
